# Supplementary material for: Epidemiological Characteristics of Cancer Patients Attending at Felege Hiwot Referral Hospital, Northwest Ethiopia
Source: MDPI journal article supplement (doi:10.3390/ijerph20065218), 2023-03-22
Supplement: s1 [file s1]

# Health Facility Cancer Register

99

| SN | MRN    | Patient Name | Sex | Age | Address (region, zone, W, Tel #) | Assessed Risk factors (enter code) | Diagnosis with stage  |         |                         | Pathology/lab results     | Co-morbidity | Treatment Start Date | Type of treatment (Surgery, RT(Y/N), Targeted Therapy, Palliative care, chemo-Cycle                          | Supportive treatment (Mention all treatments given) | Outcome (I/C/D) |
|----|--------|--------------|-----|-----|----------------------------------|------------------------------------|-----------------------|---------|-------------------------|---------------------------|--------------|----------------------|--------------------------------------------------------------------------------------------------------------|-----------------------------------------------------|-----------------|
|    |        |              |     |     |                                  |                                    | Diagnosis             | New (N) | Relapse/Recurrence (RR) | Relapse/On follow up (RF) |              |                      |                                                                                                              |                                                     |                 |
| 1  | 934227 | [REDACTED]   | M   | 46  | Bidar                            | +                                  | CRC<br>Coro rectal ca |         |                         | ✓                         | No           | 12/9/14              | Cycle 1: ✓<br>Cycle 2: ✓<br>Cycle 3: ✓<br>Cycle 4: ✓<br>Cycle 5: ✓<br>Cycle 6: ✓<br>Cycle 7: ✓<br>Cycle 8: ✓ |                                                     |                 |
| 2  | 903003 | [REDACTED]   | M   | 62  | Alefa                            | +                                  | Breast ca             |         |                         | ✓                         | No           | 12/9/14              | Cycle 1: ✓<br>Cycle 2: ✓<br>Cycle 3: ✓<br>Cycle 4: ✓<br>Cycle 5: ✓<br>Cycle 6: ✓<br>Cycle 7: ✓<br>Cycle 8: ✓ |                                                     |                 |
| 3  | 902533 | [REDACTED]   | F   | 47  | Bidar                            | +                                  | Breast                |         |                         | ✓                         |              | 8/9/14               | Cycle 1: ✓<br>Cycle 2: ✓<br>Cycle 3: ✓<br>Cycle 4: ✓<br>Cycle 5: ✓<br>Cycle 6: ✓<br>Cycle 7: ✓<br>Cycle 8: ✓ |                                                     |                 |
| 4  | 927935 | [REDACTED]   | F   | 50  | Fofera                           | +                                  | Cervical ca           |         |                         | ✓                         |              | 2/9/14               | Cycle 1: ✓<br>Cycle 2: ✓<br>Cycle 3: ✓<br>Cycle 4: ✓<br>Cycle 5: ✓<br>Cycle 6: ✓<br>Cycle 7: ✓<br>Cycle 8: ✓ |                                                     |                 |

Key for outcomes: - I= Improved, C= Cured, D= Death

New=N, Relapse/Recurrence=RR, Relapse/On follow up=RF

a) Smoking b) unhealthy diet c) harmful use of alcohol d) physical inactivity e) Obesity f) others (mention)
