# Supplementary material for: Epidemiological Characteristics of Cancer Patients Attending at Felege Hiwot Referral Hospital, Northwest Ethiopia
Source: MDPI journal article supplement (doi:10.3390/ijerph20065218), 2023-03-22

**IRB's Decision**

Meeting No.: 007/2018.

Date: June 6/ 2019

Protocol number: - 02066/18-09.....

Assigned No: 2018

**Protocol Title:-** *Epidemiological Characteristics Of cancer patients attending at Felege Hiwot Referral Hospital, Amahara region, Northwest Ethiopia*

Principal Investigator: **Dr Muluken Azage**

Institute: **College of Medicine and Health Sciences, Bahir Dar University**

Elements Reviewed (CMHS/IRB 01 - 008) : ☒ Attached ☐ Not attached

Review of Revised Application  
☒ Yes ☐ No

Date of Previous review:

Decision of the meeting: ☒ Approved ☐ Approved with Recommendation  
☐ Resubmission ☐ Disapproved

I. Elements approved:

1. Protocol Version No.: 01
2. Protocol Version Date 18/3/2019
3. Informed Consent Version: 01
4. Informed Consent Version Date: 18/3/2019

II. Obligations of the PI:

1. Comply with Standard National and International Ethical Guidelines
2. All Amendments and Changes made in the Protocol and Consent Needs IRB Approval
3. Report SAE within 10 days of the event
4. End of the study, including manuscript and thesis works should be reported to IRB

III. To NRERC ☐

Institutional Review Board (IRB) Approval: Period from...18/03/2019 to 17/03/2020

Follow-up Report Expected in:

3months \_\_\_\_\_ 6months ☒ 9months \_\_\_\_\_ One Year \_\_\_\_\_

Chairperson, IRB  
Dr Netsanet Fentaahun

Signature

Date:.....

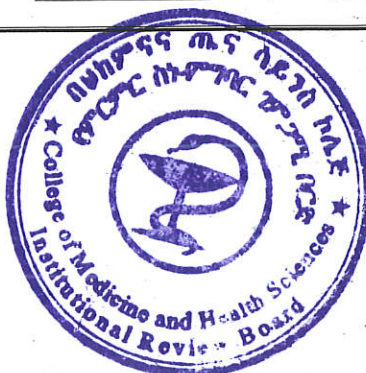

Supplement: s1 [file s1]
